# Supplementary material for: A macroevolution-inspired approach to reveal novel antibiotic resistance mechanisms
Source: Research Square preprint supplement (doi:10.21203/rs.3.rs-3838489/v2), 2025-12-17
Supplement: Supplementary file 1 [file a3683aa3c2887938368ce0e2.xlsx]

## Sheet: Sheet1
Target compartment	Antibiotic	Achronym	Structure	Activator	Target
Cell wall	Isoniazid	INH		KatG	InhA
	Ethionamide	ETH		EthA	InhA
	Ethambutom	ETB		NA	EmbCAB
	D-cycloserine	DCS		NA	Alr and Ddl
	Meropenem	MEM		NA	Transpeptidases
RNA polymerase	Rifampicin	RIF		NA	RpoB
Protein synthesis	Streptomycin	STR		NA	RpsL and rrs
	Kanamycin	KAN		NA	rrs
	Amikacin	AMK		NA	rrs
	Capreomycin	CAP		NA	rrs and TlyA
	Linezolid	LZD		NA	RplC and rrl
DNA gyrase	Moxifloxacin	MFX		NA	GyrA and GyrB
	Ofloxacin	OFX		NA	GyrA and GyrB
Folate	Para-aminosalicylic acid	PAS		folP	Unknown
ATP synthesis	Bedaquiline	BDQ		NA	AtpE
